# Supplementary material
Source: Frontiers journal article supplement (https://www.frontiersin.org/articles/301894)

**Supplementary Figure 1:**

Sperm number at the four different points in time for the time series experiment in *Cimex lectularius* (A, n=10) and in *Drosophila melanogaster* (B, n=10) for individual males.

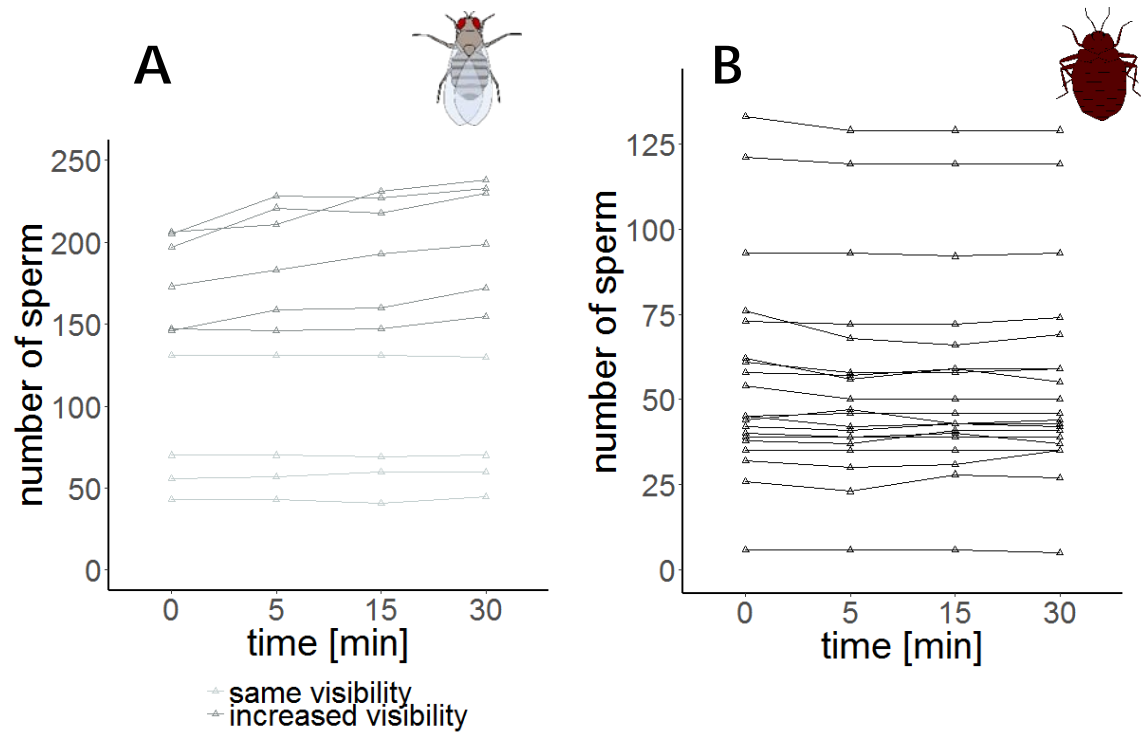

Supplement: Image_1.pdf [file Image_1.pdf]
