# Supplementary material
Source: Frontiers journal article supplement (https://www.frontiersin.org/articles/301894)
Supplement: Table_1.pdf [file Table_1.pdf]

**Supplementary Table 1:**

Time effect on sperm viability, determined by a generalised linear mixed model for the blind time experiment in *Drosophila melanogaster* for samples with same sperm visibility over time (n=4, area highlighted in grey) and samples with increased visibility over time (n=6). Time is either t0, t5, t15 or t30.

| <b>factor</b>    | <b>estimate</b>      | <b>z-value</b> | <b>p-value</b> | <b>2.5% CI</b> | <b>97.5% CI</b> |
|------------------|----------------------|----------------|----------------|----------------|-----------------|
| <b>intercept</b> | 1.70 ( $\pm 0.53$ )  | 3.23           | 0.001          |                |                 |
| <b>time</b>      | -1.15 ( $\pm 0.1$ )  | -11.13         | <0.0001        |                |                 |
| <b>intercept</b> | 1.98 ( $\pm 0.3$ )   | 6.52           | <0.0001        |                |                 |
| <b>time</b>      | -1.08 ( $\pm 0.07$ ) | -15.02         | <0.0001        |                |                 |
